# Supplementary material for: Surface Modification of GdMn2O5 for Catalytic Oxidation of Benzene via a Mild A-Site Sacrificial Strategy
Source: MDPI journal article supplement (doi:10.3390/catal12101267), 2022-10-18
Supplement: s1 [file s1]

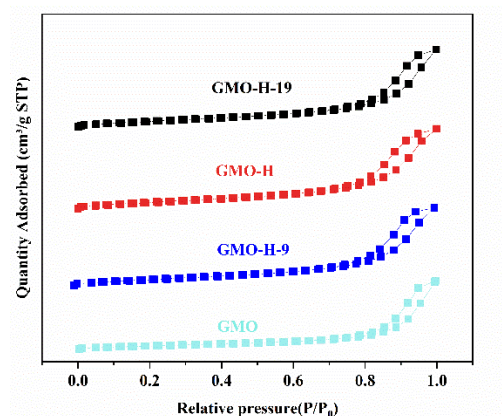

Figure S1. Nitrogen adsorption-desorption isotherms.

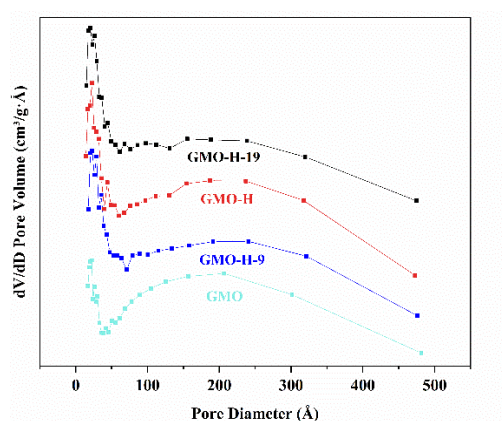

Figure S2. Pore size distribution.

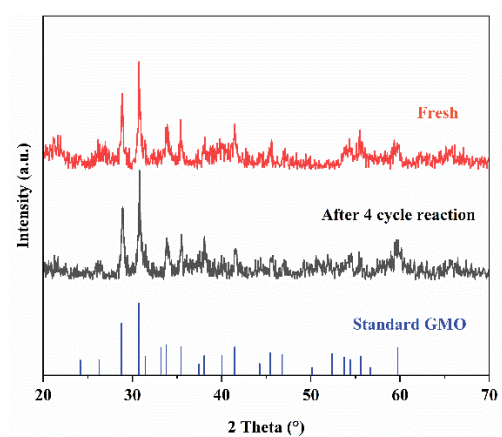

Figure S3. XRD patterns of fresh GMO-H and used GMO-H.

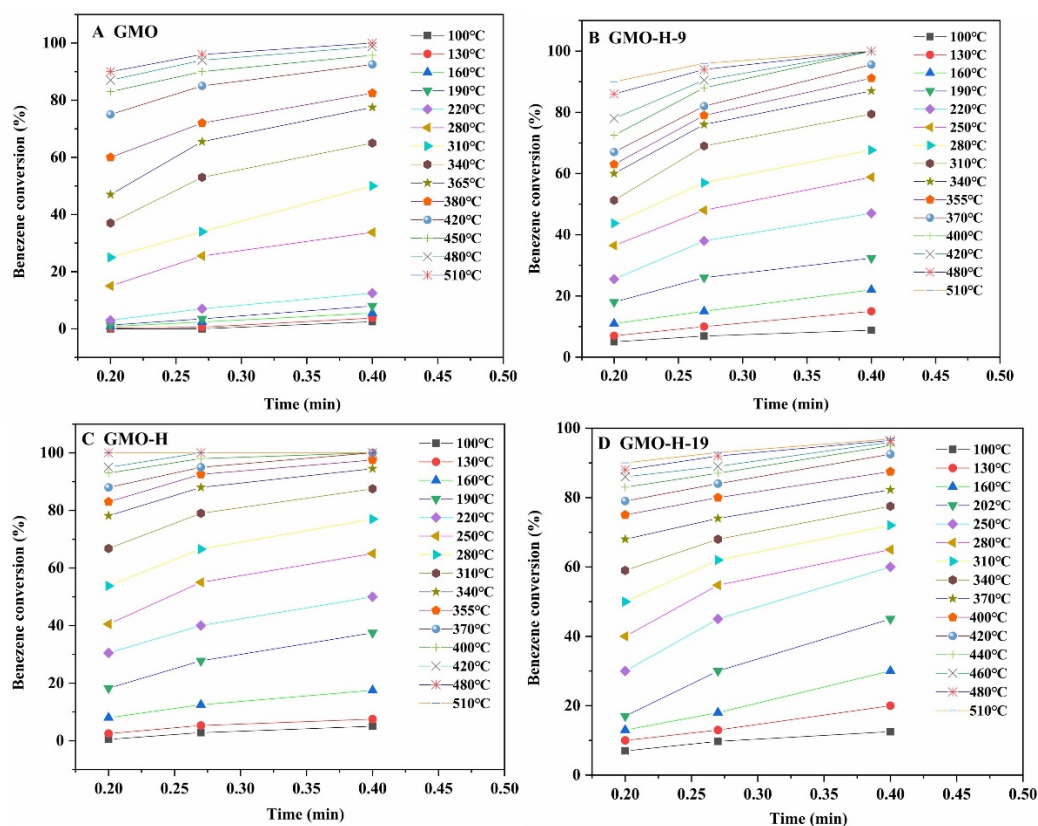

**Figure S4.** Benzene conversion versus time on-stream curves at different temperatures.

**Table S1.** Experimental conditions of temperature programmed experiments.

|                     | Sample Mass | Pretreatment Condition | Adsorption Conditions                  | Desorption/Reduction Conditions                      |
|---------------------|-------------|------------------------|----------------------------------------|------------------------------------------------------|
| O <sub>2</sub> -TPD | 50 mg       | He<br>200 °C, 1 h      | 5% O <sub>2</sub> /He<br>50 °C, 1 h    | He<br>50 °C-700 °C<br>10 °C/min                      |
| H <sub>2</sub> -TPR | 50 mg       | He<br>300 °C, 1 h      | 10% H <sub>2</sub> /Ar<br>50 °C, 0.5 h | 10 % H <sub>2</sub> /Ar<br>50 °C-700 °C<br>10 °C/min |
